# Supplementary material
Source: Springer Nature journal article supplement (https://www.springermedizin.de/resource/supplementary/12874_2010_516_MOESM3_ESM.pdf/9432434)
Supplement: MOESM3 [file 9432434]

Young adults  
age 18-25  
Linköping-Kisa-Åtvidaberg  
n ≈ 20 000

Contact with 'Unga Vuxna' during 1 year  
n ≈ 500

Anxiety  
syndrome  
n ≈ 250

Behavioural  
problems

Substance  
abuse

Relational  
problems

Other  
reasons
